# Supplementary material
Source: PubMed Central journal article supplement (PMC5955843)
Supplement: NIHMS960514-supplement-216_2018_1016_MOESM2_ESM.pdf [file NIHMS960514-supplement-216_2018_1016_MOESM2_ESM.pdf]

## **Analytical and Bioanalytical Chemistry**

### **Electronic Supplementary Material**

#### **Sizing lipid droplets from adult and geriatric mouse liver tissue via nanoparticle tracking analysis**

Katherine A. Muratore, Charles P. Najt, Nicholas M. Livezey, James Marti,  
Douglas G. Mashek, Edgar A. Arriaga

Additional file available under „Supplementary material“.

## Table of Contents

|                                                                      |    |
|----------------------------------------------------------------------|----|
| Supplementary Data Analysis                                          | 3  |
| Figure S1. TEM of 31nm polystyrene latex nanospheres                 | 4  |
| Figure S2. Isolation of lipid droplets from mouse liver              | 5  |
| Table S1. ANOVA and post-hoc Tukey analysis of mean LD size          | 6  |
| Table S2. ANOVA and post-hoc Tukey analysis of mean LD concentration | 6  |
| Figure S3. Histograms for stability study                            | 7  |
| Figure S4. Stability study residuals analysis                        | 8  |
| Figure S5. Scatter plot of relative uncertainty                      | 9  |
| Figure S6. QQ plot of average adult and individual geriatric mice    | 10 |

### Supplementary Data Analysis

For particle size standards measured by NTA, we report the following % error and correction factors, as defined in the main text:

| Size Standard | Nominal Size, nm | Size by TEM, nm | Size by NTA, nm | <i>e</i> | <i>c</i> |
|---------------|------------------|-----------------|-----------------|----------|----------|
| 3030A         | 31               | 25              | 38              | 0.52     | 0.48     |
| 3K-100        | 102              | 102             | 108             | 0.05     | 0.95     |
| 3K-200        | 203              | 203             | 203             | 0        | 1        |

To determine the correction factor at additional particle sizes in this study, we performed linear interpolation in MATLAB 2016b between the correction factors of the standards. The correction factor for sizes <25 nm was assumed to be 0.48 and the correction for sizes >203nm was assumed to be 1.

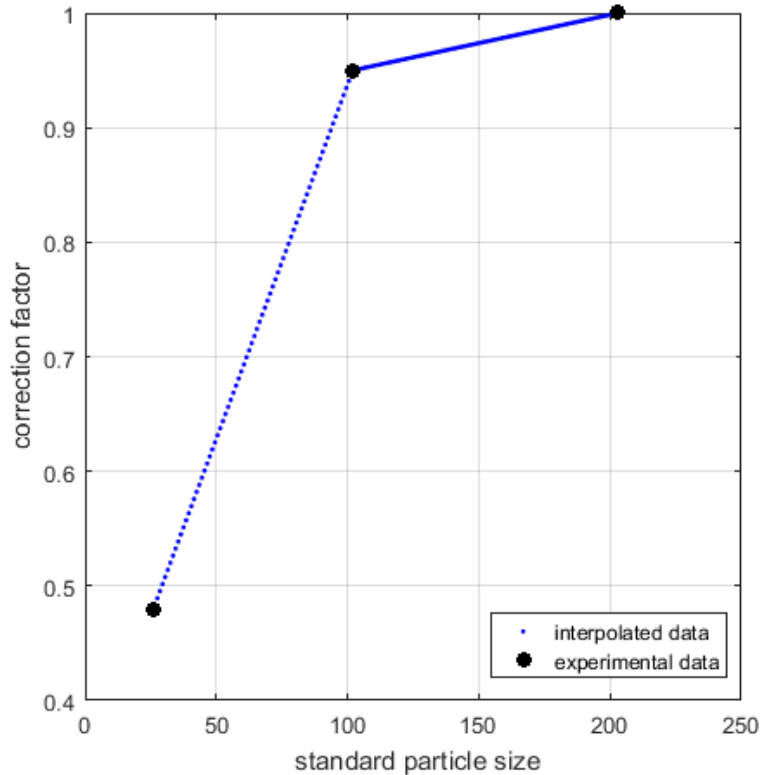

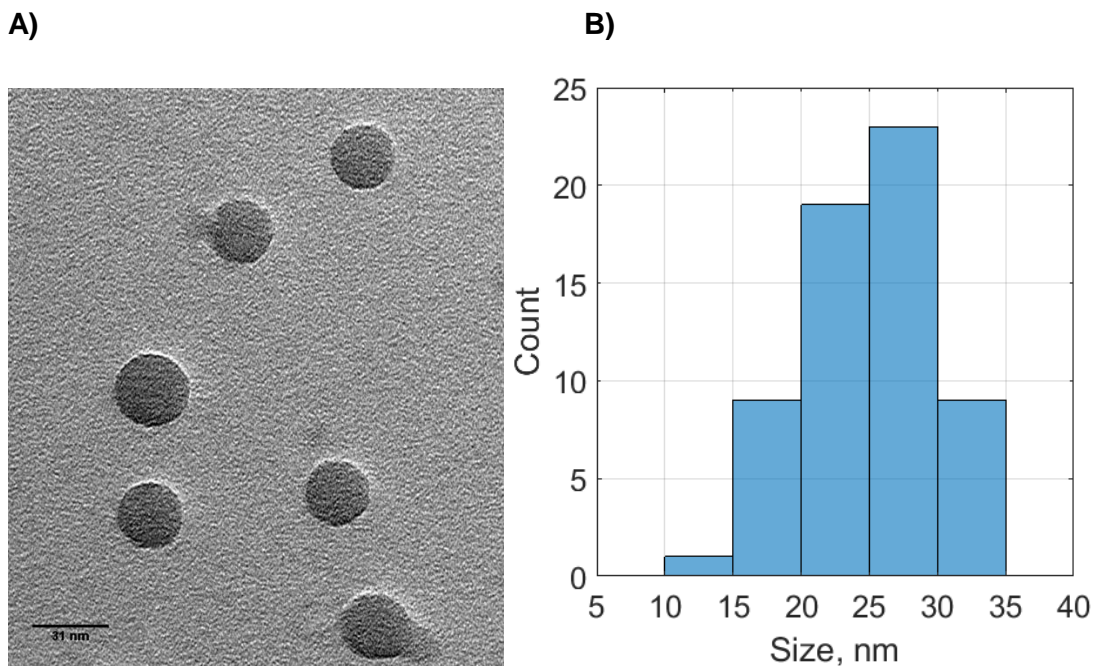

**Fig. S1** (A) TEM of 31nm Polystyrene Latex Nanospheres. Two  $\mu\text{l}$  of a nanosphere suspension were pipetted onto a copper grid and allowed to air dry. The nanospheres were imaged on a Tecnai T12 transmission electron microscope (FEI, Hillsboro, Oregon). The nanosphere size was determined from the resulting images using ImageJ (NIH, Bethesda, Maryland). The mean particle size was  $25\text{nm} \pm 5\text{nm}$  (average  $\pm$  SEM,  $n=60$  nanospheres). The above image is representative of several images used to measure 60 nanospheres total. (B) Histogram of 31nm Polystyrene Latex Nanospheres.  $n=60$  nanospheres were measured and included in the histogram

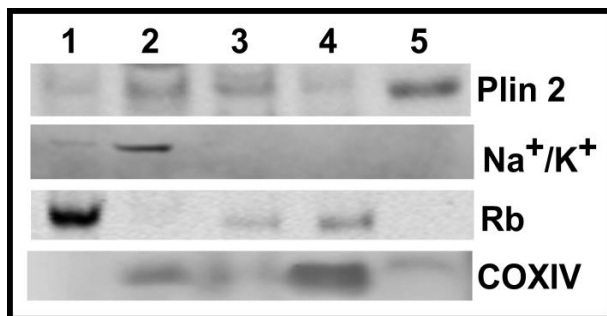

**Fig. S2** Isolation of lipid droplets from mouse liver. To determine the purity of the lipid droplets, fractions containing the nucleus, plasma membrane, cytosol, mitochondria, and lipid droplet were collected and subjected to Western blot analysis. The fractions were probed for markers unique to each organelle, and cross contamination assessed. In brief, liver homogenates (10-20  $\mu$ g protein) were separated on 10% tricine gels using a Mini-Protean II cell (Bio-Rad lab, Hercules, CA) system at constant amperage (40 mA per gel) for about 2 hrs. Proteins were then transferred onto PVDF membranes at constant voltage (90 V) for 2 hrs. Blots were stained with Ponceau S to confirm uniform protein loading before blocking in 5% BSA in TBST (10 mM Tris-HCl, pH 8, 100mM NaCl, 0.05% Tween-20) for 1 hour. Rabbit polyclonal antibodies against Na<sup>+</sup>/K<sup>+</sup> channel (plasma membrane marker), Rb (nuclear marker), and COXIV (mitochondrion marker) were obtained from Cell Signaling Technology (Danvers, MA) and used at 1:1000 dilution in 5% BSA/TBST. Rabbit polyclonal antibody against Plin2 (lipid droplet marker) was prepared in house as previously described [1-2] and used at 1:1000 dilution in 5% BSA/TBST. Blots were incubated with primary antibodies overnight and were developed with IRDye 800CW anti-mouse (LI-COR) or IRDye 680RD antirabbit (LI-COR) secondary antibodies. To visualize the bands of interest, blots were scanned using the LI-COR Odyssey imaging system (Lincoln, NE). Lane 1, nucleus; lane 2, plasma membrane; lane 3, cytosol; lane 4, mitochondria; and lane 5, lipid droplets

#### Protocol References

1. Atshaves, B. P. *et al.* Expression and intracellular processing of the 58 kDa sterol carrier protein-2/3-oxoacyl-CoA thiolase in transfected mouse L-cell fibroblasts. *J. Lipid Res.* **40**, 610–22 (1999).
2. McIntosh, A. L. *et al.* Direct interaction of Plin2 with lipids on the surface of lipid droplets: a live cell FRET analysis. *AJP Cell Physiol.* **303**, C728–C742 (2012).

### 1A. ANOVA Table

| Sources of Variation | SS    | df | MS   | F     | P        |
|----------------------|-------|----|------|-------|----------|
| Between Groups       | 9345  | 3  | 3115 | 65.58 | P<0.0001 |
| Within Groups        | 760   | 16 | 47.5 |       |          |
| Total                | 10110 | 19 |      |       |          |

### 1B. Tukey's

| Multiple Comparison Test | Mean Diff. | q      | P value   | 95% CI of diff    |
|--------------------------|------------|--------|-----------|-------------------|
| Day 0 vs Day 1           | 3          | 0.9733 | P > 0.05  | -9.471 to 15.47   |
| Day 0 vs Day 2           | -10        | 3.244  | P > 0.05  | -22.47 to 2.471   |
| Day 0 vs Day 7           | -51        | 16.55  | P < 0.001 | -63.47 to -38.53  |
| Day 1 vs Day 2           | -13        | 4.218  | P < 0.05  | -25.47 to -0.5294 |
| Day 1 vs Day 7           | -54        | 17.52  | P < 0.001 | -66.47 to -41.53  |
| Day 2 vs Day 7           | -41        | 13.3   | P < 0.001 | -53.47 to -28.53  |

**Table S1** ANOVA and post-hoc Tukey analysis of mean LD size. Rows highlighted in yellow indicate statistical significance

### 2A. ANOVA TABLE

| Sources of Variation | SS    | df | MS      | F     | P      |
|----------------------|-------|----|---------|-------|--------|
| Between Groups       | 2.678 | 3  | 0.8928  | 13.68 | 0.0001 |
| Within Groups        | 1.044 | 16 | 0.06525 |       |        |
| Total                | 3.722 | 19 |         |       |        |

### 2B. Tukey's

| Multiple Comparison Test | Mean Diff. | q      | P value   | 95% CI of diff    |
|--------------------------|------------|--------|-----------|-------------------|
| Day 0 vs Day 1           | 0.02       | 0.1751 | P > 0.05  | -0.4422 to 0.4822 |
| Day 0 vs Day 2           | 0.75       | 6.565  | P < 0.01  | 0.2878 to 1.212   |
| Day 0 vs Day 7           | -0.22      | 1.926  | P > 0.05  | -0.6822 to 0.2422 |
| Day 1 vs Day 2           | 0.73       | 6.39   | P < 0.01  | 0.2678 to 1.192   |
| Day 1 vs Day 7           | -0.24      | 2.101  | P > 0.05  | -0.7022 to 0.2222 |
| Day 2 vs Day 7           | -0.97      | 8.491  | P < 0.001 | -1.432 to -0.5078 |

**Table S2** ANOVA and post-hoc Tukey analysis of mean LD concentration. Rows highlighted in yellow indicate statistical significance

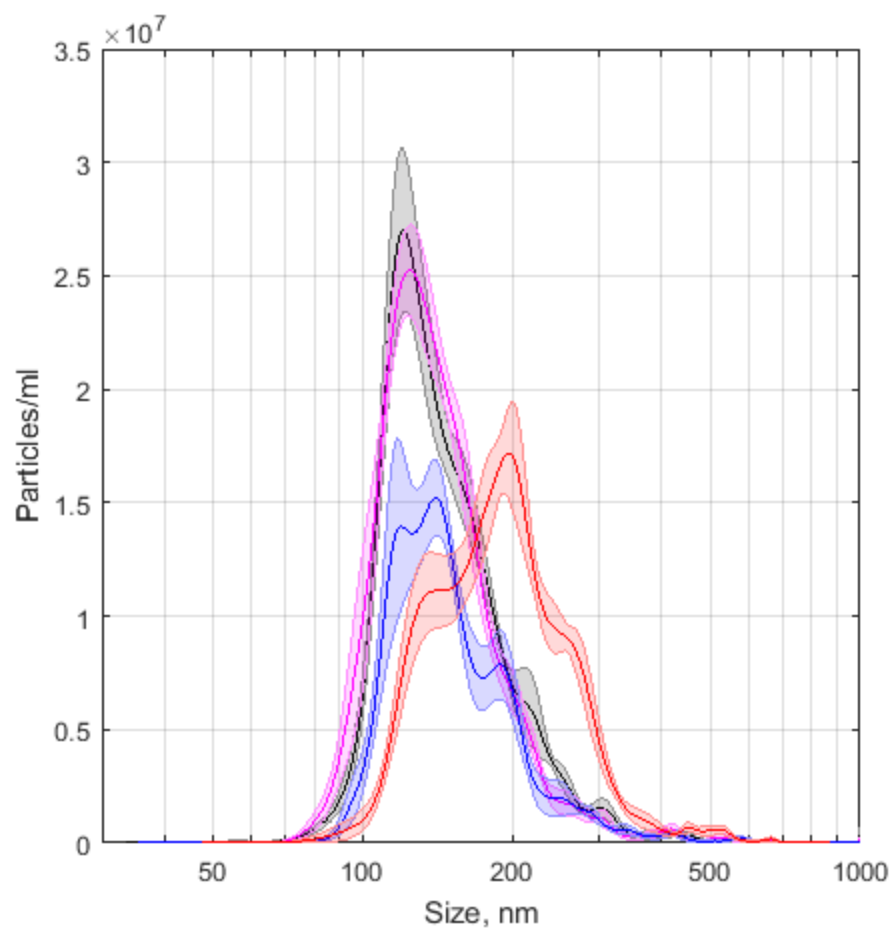

**Fig. S3** Histograms for stability study. Day 0 is black, Day 1 is magenta, Day 2 is blue, and Day 7 is red, respectively. Shaded area represents average  $\pm$  SEM, n=5 technical replicates

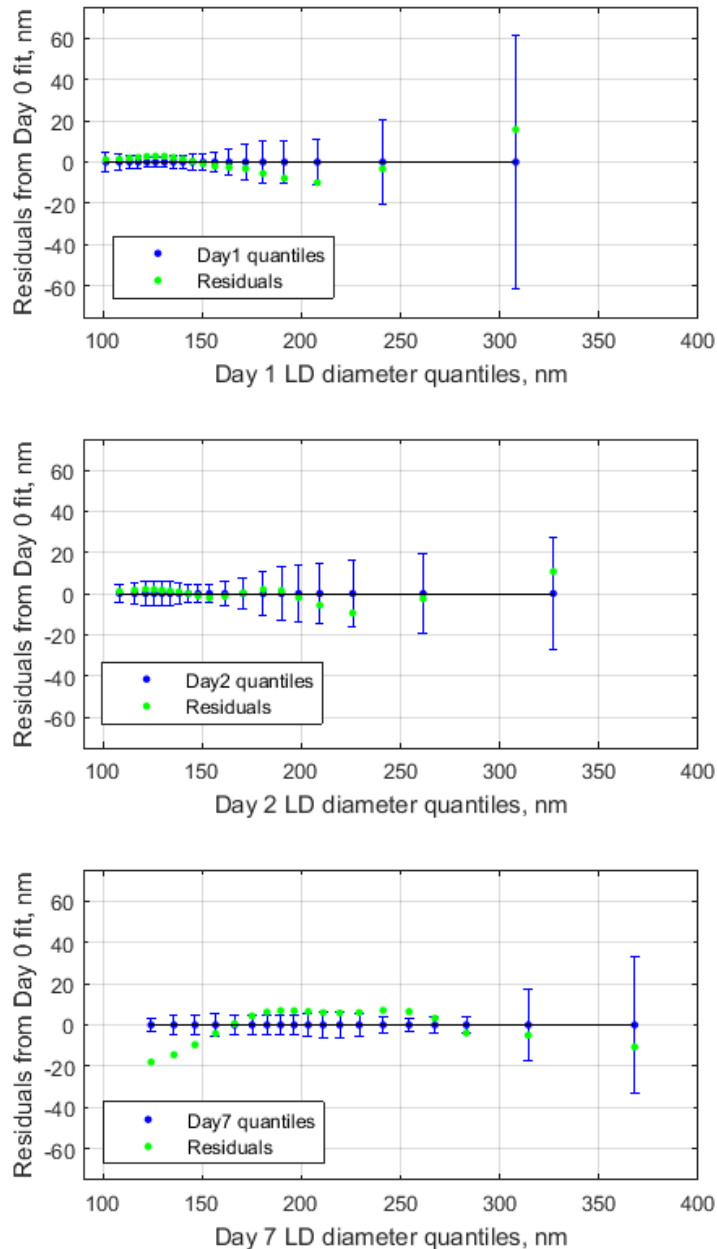

**Fig. S4** Residuals of linear regression analyses of QQ plots. Each marker represents percentiles from 5<sup>th</sup> to 95<sup>th</sup> quantile, increasing by 5%. Their values (blue) are average  $\pm$  SEM, n=5 technical replicates. The residuals of linear fits of percentile values in QQ plots are graphically represented on top of the respective quantile. If a majority of residuals fall within the error bars, the linear fit predicted by the Day 0 distribution is a suitable model. When the residuals for the Day 1 vs Day 0 and Day 2 vs Day 0 are graphed, they are within the range of SEM for each day, respectively. When the residuals are graphed for Day 7 vs Day 0, the majority of the residuals fall outside the SEM. This strengthens the evidence for a statistically significant difference in distribution shape between Day 0 and Day 7



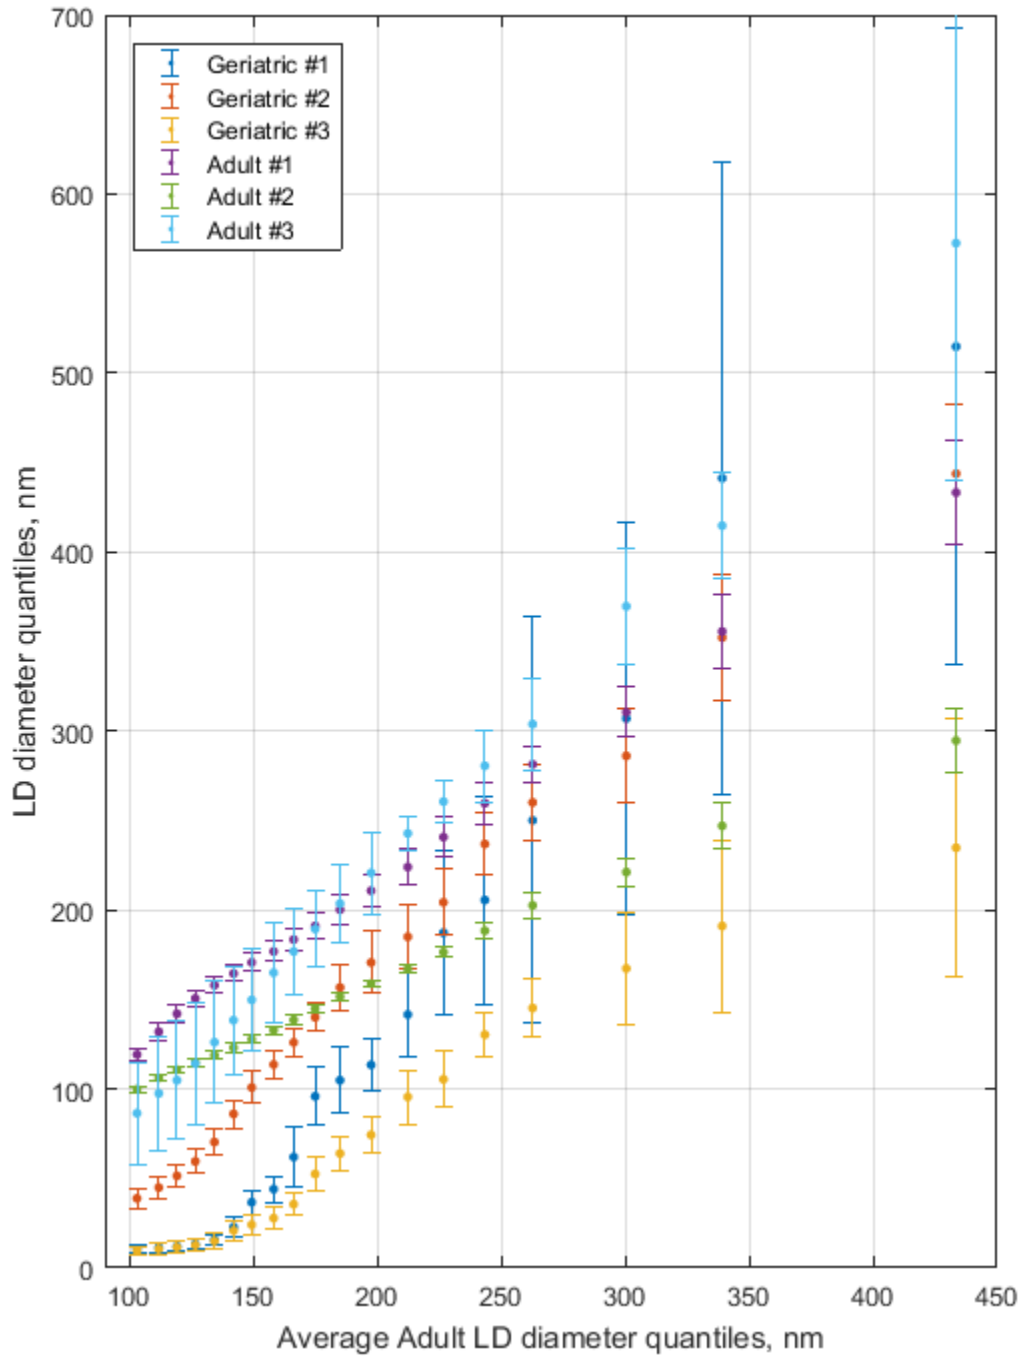

**Fig. S5** Comparison of the lipid droplet size distributions of individual mice. Geriatric and adult mice were ~ 115 and ~ 35 weeks old, respectively. Markers represent percentiles ranging from 5<sup>th</sup> to 95<sup>th</sup> percentile at 5% increments. Each percentile is represented as average  $\pm$  SEM, n = 3 mice

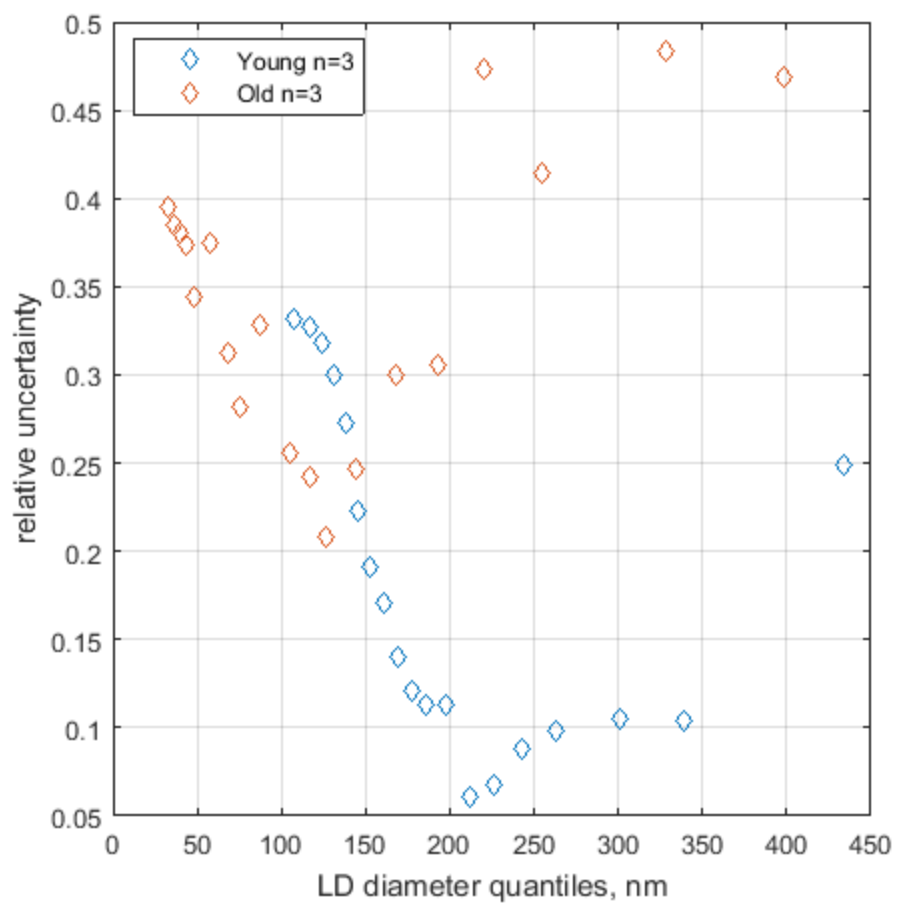

**Fig. S6** Scatter plot of relative uncertainty. Relative uncertainty (y-axis) is defined as SEM/average. Each marker represents a percentile in the range from 5<sup>th</sup> to 95<sup>th</sup> percentile (x-axis)
